# Supplementary material for: Two-Generation Toxicity Study of the Antioxidant Compound Propyl-Propane Thiosulfonate (PTSO)
Source: MDPI journal article supplement (doi:10.3390/antiox13030350), 2024-03-15
Supplement: s1 [file s1]

**Table S1.** Relative organ weight/body weights (%), and relative organ weight/brain weights (%) of parental F0 male and female CD1 mice fed with different doses of PTSO (0, 14, 28 and 55 mg/kg b.w./day). Values are mean and SD for 20 mice/sex/group.

| ORGAN WEIGHT TO B.W. RATIOS DATA SUMMARY OF PARENTAL F0 MICE  |      |         |         |         |         |            |      |         |         |         |         |
|---------------------------------------------------------------|------|---------|---------|---------|---------|------------|------|---------|---------|---------|---------|
| PARAMETERS                                                    |      | MALE    |         |         |         | PARAMETERS |      | FEMALE  |         |         |         |
|                                                               |      | 0       | 14      | 28      | 55      |            |      | 0       | 14      | 28      | 55      |
|                                                               |      | N=20    | N=20    | N=20    | N=20    |            |      | N=20    | N=20    | N=20    | N=20    |
| B                                                             | MEAN | 1.030   | 1.086   | 1.053   | 0.996   | B          | MEAN | 1.227   | 1.257   | 1.211   | 1.269   |
|                                                               | SD   | 0.095   | 0.178   | 0.167   | 0.140   |            | SD   | 0.216   | 0.148   | 0.148   | 0.121   |
| L                                                             | MEAN | 5.028   | 5.511   | 4.938   | 4.553   | L          | MEAN | 5.742   | 5.469   | 5.719   | 5.669   |
|                                                               | SD   | 0.367   | 1.707   | 0.880   | 0.948   |            | SD   | 0.680   | 0.637   | 1.119   | 0.640   |
| LK                                                            | MEAN | 0.802   | 0.700   | 0.798   | 0.796   | LK         | MEAN | 0.584   | 0.607   | 0.595   | 0.620   |
|                                                               | SD   | 0.112   | 0.192   | 0.147   | 0.097   |            | SD   | 0.054   | 0.161   | 0.100   | 0.055   |
| RK                                                            | MEAN | 0.822   | 0.866   | 0.992   | 0.804   | RK         | MEAN | 0.602   | 0.572   | 0.609   | 0.614   |
|                                                               | SD   | 0.147   | 0.091   | 0.159   | 0.089   |            | SD   | 0.051   | 0.048   | 0.079   | 0.040   |
| S                                                             | MEAN | 0.219   | 0.238   | 0.231   | 0.220   | S          | MEAN | 0.381   | 0.411   | 0.368   | 0.357   |
|                                                               | SD   | 0.072   | 0.050   | 0.059   | 0.092   |            | SD   | 0.070   | 0.074   | 0.113   | 0.065   |
| LA                                                            | MEAN | 0.014   | 0.011   | 0.012   | 0.013   | LA         | MEAN | 0.019   | 0.018   | 0.020   | 0.021   |
|                                                               | SD   | 0.004   | 0.006   | 0.004   | 0.004   |            | SD   | 0.004   | 0.005   | 0.004   | 0.008   |
| RA                                                            | MEAN | 0.012   | 0.010   | 0.011   | 0.011   | RA         | MEAN | 0.019   | 0.020   | 0.017   | 0.021   |
|                                                               | SD   | 0.003   | 0.002   | 0.004   | 0.006   |            | SD   | 0.004   | 0.006   | 0.006   | 0.007   |
| P                                                             | MEAN | 0.062   | 0.075   | 0.075   | 0.069   |            |      |         |         |         |         |
|                                                               | SD   | 0.018   | 0.017   | 0.020   | 0.025   |            |      |         |         |         |         |
| SV                                                            | MEAN | 1.213   | 1.311   | 1.306   | 1.166   |            |      |         |         |         |         |
|                                                               | SD   | 0.423   | 0.245   | 0.250   | 0.237   |            |      |         |         |         |         |
| ORGAN WEIGHT TO BRAIN RATIOS DATA SUMMARY OF PARENTAL F0 MICE |      |         |         |         |         |            |      |         |         |         |         |
| PARAMETERS                                                    |      | MALE    |         |         |         | PARAMETERS |      | FEMALE  |         |         |         |
|                                                               |      | 0       | 14      | 28      | 55      |            |      | 0       | 14      | 28      | 55      |
|                                                               |      | N=20    | N=20    | N=20    | N=20    |            |      | N=20    | N=20    | N=20    | N=20    |
| L                                                             | MEAN | 491.909 | 526.185 | 458.240 | 464.944 | B          | MEAN | 498.184 | 441.984 | 482.873 | 455.115 |
|                                                               | SD   | 56.351  | 219.669 | 153.279 | 111.834 |            | SD   | 189.359 | 90.869  | 127.586 | 68.717  |
| LK                                                            | MEAN | 78.093  | 69.467  | 70.926  | 80.984  | L          | MEAN | 50.486  | 48.685  | 49.764  | 49.366  |
|                                                               | SD   | 9.422   | 7.265   | 15.319  | 12.435  |            | SD   | 19.048  | 14.214  | 9.672   | 5.495   |
| RK                                                            | MEAN | 79.870  | 85.395  | 89.643  | 81.713  | LK         | MEAN | 51.446  | 45.774  | 50.278  | 49.421  |
|                                                               | SD   | 12.928  | 9.466   | 16.991  | 11.839  |            | SD   | 15.452  | 5.389   | 7.352   | 5.721   |
| S                                                             | MEAN | 21.460  | 22.444  | 20.879  | 24.280  | RK         | MEAN | 32.630  | 33.745  | 27.833  | 28.731  |
|                                                               | SD   | 6.973   | 6.218   | 5.933   | 2.239   |            | SD   | 11.420  | 8.536   | 14.039  | 5.022   |
| LA                                                            | MEAN | 1.349   | 1.071   | 1.107   | 1.279   | S          | MEAN | 1.626   | 1.382   | 1.631   | 1.655   |
|                                                               | SD   | 0.405   | 0.467   | 0.419   | 0.393   |            | SD   | 0.739   | 0.399   | 0.329   | 0.695   |
| RA                                                            | MEAN | 1.104   | 0.956   | 0.960   | 1.215   | LA         | MEAN | 1.682   | 1.585   | 1.431   | 1.663   |
|                                                               | SD   | 0.301   | 0.194   | 0.319   | 0.354   |            | SD   | 0.961   | 0.480   | 0.506   | 0.594   |
| P                                                             | MEAN | 6.006   | 7.069   | 6.637   | 7.142   |            |      |         |         |         |         |
|                                                               | SD   | 1.808   | 2.068   | 2.021   | 2.842   |            |      |         |         |         |         |
| SV                                                            | MEAN | 118.457 | 123.194 | 118.682 | 118.411 |            |      |         |         |         |         |
|                                                               | SD   | 38.622  | 27.001  | 25.130  | 25.023  |            |      |         |         |         |         |

Adrenal Gland (Left): LA; Adrenal Gland (Right): RA; Brain: B; Epididymis (Left): LE; Epididymis (Right): RE; Kidney (Left): LK; Kidney (Right): RK; Liver: L; Prostate: P; Seminal Vesicle: SV; Spleen: S.

**Table S2.** Relative organ weight/body weights (%), and relative organ weight/brain weights (%) of parental F1 male and female CD1 mice fed with different doses of PTSO (0, 14, 28 and 55 mg/kg b.w./day). Values are mean and SD for 20 mice/sex/group.

| ORGAN WEIGHT TO B.W. RATIO DATA SUMMARY OF PARENTAL F1 MICE  |      |         |         |         |         |            |      |         |         |         |         |
|--------------------------------------------------------------|------|---------|---------|---------|---------|------------|------|---------|---------|---------|---------|
| PARAMETERS                                                   |      | MALE    |         |         |         | PARAMETERS |      | FEMALE  |         |         |         |
|                                                              |      | 0       | 14      | 28      | 55      |            |      | 0       | 14      | 28      | 55      |
|                                                              |      | N=20    | N=20    | N=20    | N=20    |            |      | N=20    | N=20    | N=20    | N=20    |
| B                                                            | MEAN | 1.068   | 0.964   | 0.957   | 1.057   | B          | MEAN | 1.289   | 1.207   | 1.236   | 1.186   |
|                                                              | SD   | 0.119   | 0.185   | 0.081   | 0.161   |            | SD   | 0.198   | 0.149   | 0.173   | 0.148   |
| L                                                            | MEAN | 5.243   | 5.119   | 4.967   | 5.102   | L          | MEAN | 5.675   | 5.194   | 5.515   | 5.679   |
|                                                              | SD   | 0.528   | 0.599   | 0.668   | 0.404   |            | SD   | 0.784   | 0.480   | 0.747   | 0.951   |
| LK                                                           | MEAN | 0.816   | 0.722   | 0.735   | 0.754   | LK         | MEAN | 0.643   | 0.568   | 0.627   | 0.611   |
|                                                              | SD   | 0.076   | 0.117   | 0.078   | 0.132   |            | SD   | 0.149   | 0.069   | 0.097   | 0.099   |
| RK                                                           | MEAN | 0.832   | 0.754   | 0.761   | 0.737   | RK         | MEAN | 0.599   | 0.569   | 0.622   | 0.614   |
|                                                              | SD   | 0.087   | 0.126   | 0.093   | 0.133   |            | SD   | 0.072   | 0.054   | 0.098   | 0.114   |
| S                                                            | MEAN | 0.252   | 0.247   | 0.226   | 0.278   | S          | MEAN | 0.377   | 0.368   | 0.376   | 0.361   |
|                                                              | SD   | 0.049   | 0.051   | 0.066   | 0.090   |            | SD   | 0.092   | 0.143   | 0.120   | 0.106   |
| LA                                                           | MEAN | 0.016   | 0.011   | 0.015   | 0.017   | LA         | MEAN | 0.020   | 0.017   | 0.022   | 0.020   |
|                                                              | SD   | 0.011   | 0.006   | 0.007   | 0.010   |            | SD   | 0.008   | 0.008   | 0.007   | 0.010   |
| RA                                                           | MEAN | 0.018   | 0.013   | 0.014   | 0.016   | RA         | MEAN | 0.019   | 0.024   | 0.023   | 0.021   |
|                                                              | SD   | 0.009   | 0.004   | 0.005   | 0.008   |            | SD   | 0.005   | 0.014   | 0.007   | 0.011   |
| LT                                                           | MEAN | 0.292   | 0.271   | 0.274   | 0.299   | U          | MEAN | 0.595   | 0.486   | 0.487   | 0.499   |
|                                                              | SD   | 0.051   | 0.068   | 0.060   | 0.063   |            | SD   | 0.262   | 0.164   | 0.163   | 0.160   |
| RT                                                           | MEAN | 0.286   | 0.278   | 0.271   | 0.295   | LO         | MEAN | 0.061   | 0.066   | 0.056   | 0.062   |
|                                                              | SD   | 0.056   | 0.070   | 0.082   | 0.047   |            | SD   | 0.015   | 0.032   | 0.013   | 0.023   |
| LE                                                           | MEAN | 0.131   | 0.116   | 0.143   | 0.164   | RO         | MEAN | 0.056   | 0.080   | 0.066   | 0.067   |
|                                                              | SD   | 0.051   | 0.027   | 0.066   | 0.064   |            | SD   | 0.020   | 0.043   | 0.028   | 0.024   |
| RE                                                           | MEAN | 0.125   | 0.123   | 0.143   | 0.142   |            |      |         |         |         |         |
|                                                              | SD   | 0.044   | 0.034   | 0.060   | 0.051   |            |      |         |         |         |         |
| P                                                            | MEAN | 0.106   | 0.104   | 0.095   | 0.107   |            |      |         |         |         |         |
|                                                              | SD   | 0.047   | 0.035   | 0.046   | 0.046   |            |      |         |         |         |         |
| SV                                                           | MEAN | 1.017   | 1.028   | 1.017   | 1.002   |            |      |         |         |         |         |
|                                                              | SD   | 0.094   | 0.186   | 0.182   | 0.214   |            |      |         |         |         |         |
| ORGAN WEIGHT TO BRAIN RATIO DATA SUMMARY OF PARENTAL F1 MICE |      |         |         |         |         |            |      |         |         |         |         |
| PARAMETERS                                                   |      | MALE    |         |         |         | PARAMETERS |      | FEMALE  |         |         |         |
|                                                              |      | 0       | 14      | 28      | 55      |            |      | 0       | 14      | 28      | 55      |
|                                                              |      | N=20    | N=20    | N=20    | N=20    |            |      | N=20    | N=20    | N=20    | N=20    |
| L                                                            | MEAN | 496.107 | 547.793 | 530.050 | 493.302 | L          | MEAN | 452.506 | 435.046 | 451.618 | 485.054 |
|                                                              | SD   | 73.530  | 118.418 | 88.028  | 84.901  |            | SD   | 108.454 | 54.441  | 73.560  | 98.720  |
| LK                                                           | MEAN | 83.978  | 74.683  | 78.282  | 71.643  | LK         | MEAN | 50.579  | 47.267  | 51.056  | 51.855  |
|                                                              | SD   | 18.056  | 11.471  | 9.857   | 9.213   |            | SD   | 12.339  | 4.688   | 7.276   | 8.259   |
| RK                                                           | MEAN | 78.643  | 75.598  | 78.844  | 70.274  | RK         | MEAN | 47.238  | 47.326  | 50.545  | 51.913  |
|                                                              | SD   | 10.938  | 14.325  | 10.278  | 11.475  |            | SD   | 7.824   | 3.897   | 7.012   | 8.949   |
| S                                                            | MEAN | 23.673  | 26.419  | 24.356  | 26.087  | S          | MEAN | 29.619  | 30.339  | 30.964  | 30.891  |
|                                                              | SD   | 4.602   | 7.585   | 7.936   | 5.540   |            | SD   | 7.948   | 9.881   | 11.454  | 9.172   |
| LA                                                           | MEAN | 1.538   | 1.120   | 1.574   | 1.567   | LA         | MEAN | 1.593   | 1.457   | 1.815   | 1.671   |
|                                                              | SD   | 1.080   | 0.678   | 0.790   | 0.946   |            | SD   | 0.800   | 0.730   | 0.687   | 0.947   |
| RA                                                           | MEAN | 1.715   | 1.308   | 1.513   | 1.529   | RA         | MEAN | 1.468   | 1.987   | 1.897   | 1.813   |
|                                                              | SD   | 0.899   | 0.678   | 0.494   | 0.701   |            | SD   | 0.464   | 1.262   | 0.659   | 0.967   |
| LT                                                           | MEAN | 27.509  | 28.688  | 28.917  | 28.278  | U          | MEAN | 45.850  | 40.875  | 38.697  | 42.501  |
|                                                              | SD   | 4.632   | 7.594   | 5.224   | 3.914   |            | SD   | 17.786  | 13.352  | 9.572   | 14.505  |
| RT                                                           | MEAN | 26.987  | 29.158  | 28.586  | 28.121  | LO         | MEAN | 4.813   | 5.387   | 4.563   | 5.177   |
|                                                              | SD   | 5.365   | 6.757   | 7.830   | 3.602   |            | SD   | 1.472   | 2.481   | 0.992   | 1.862   |
| LE                                                           | MEAN | 12.174  | 12.621  | 15.032  | 15.477  | RO         | MEAN | 4.355   | 6.629   | 5.508   | 5.681   |

|    |      |        |         |         |        |    |       |       |       |       |
|----|------|--------|---------|---------|--------|----|-------|-------|-------|-------|
|    | SD   | 4.269  | 4.339   | 6.309   | 5.784  | SD | 1.336 | 3.413 | 2.834 | 2.018 |
| RE | MEAN | 11.691 | 12.998  | 15.084  | 13.413 |    |       |       |       |       |
|    | SD   | 3.955  | 4.104   | 5.858   | 4.583  |    |       |       |       |       |
| P  | MEAN | 10.162 | 11.248  | 10.164  | 10.145 |    |       |       |       |       |
|    | SD   | 4.734  | 4.718   | 4.826   | 4.431  |    |       |       |       |       |
| SV | MEAN | 96.257 | 108.891 | 108.222 | 95.672 |    |       |       |       |       |
|    | SD   | 13.750 | 24.104  | 20.890  | 20.479 |    |       |       |       |       |

Adrenal Gland (Left): LA; Adrenal Gland (Right): RA; Brain: B; Epididymis (Left): LE; Epididymis (Right): RE; Kidney (Left): LK; Kidney (Right): RK; Liver: L; Ovary (Left): LO; Ovary (Right): RO; Prostate: P; Seminal Vesicle: SV; Spleen: S; Testicle (Left): LT; Testicle (Right): RT; Uterus: U.

**Table S3.** Relative organ weight/body weights (%), and relative organ weight/brain weights (%) of F1 and F2 offspring male and female CD1 mice fed with different doses of PTSO (0, 14, 28 and 55 mg/kg b.w./day). Values are mean and SD for 20 mice/sex/group. The coded symbols represent the following: #—statistical differences compared with 14 mg PTSO/kg b. w./day.

| ORGAN WEIGHT TO B.W. RATIO DATA SUMMARY OF OFFSPRING F1 MICE  |      |            |        |        |        |            |      |            |        |        |        |
|---------------------------------------------------------------|------|------------|--------|--------|--------|------------|------|------------|--------|--------|--------|
| PARAMETERS                                                    |      | MALE       |        |        |        | PARAMETERS |      | FEMALE     |        |        |        |
|                                                               |      | 0          | 14     | 28     | 55     |            |      | 0          | 14     | 28     | 55     |
|                                                               |      | N=22       | N=20   | N=22   | N=22   |            |      | N=22       | N=21   | N=21   | N=22   |
| B                                                             | MEAN | 2.379      | 2.473  | 2.394  | 2.463  | B          | MEAN | 2.798      | 2.737  | 2.857  | 2.847  |
|                                                               | SD   | 0.439      | 0.518  | 0.459  | 0.442  |            | SD   | 0.580      | 0.792  | 0.514  | 0.487  |
| S                                                             | MEAN | 0.636      | 0.653  | 0.643  | 0.772  | S          | MEAN | 0.621      | 0.671  | 0.689  | 0.711  |
|                                                               | SD   | 0.220      | 0.162  | 0.143  | 0.182  |            | SD   | 0.186      | 0.189  | 0.191  | 0.235  |
| T                                                             | MEAN | 0.541      | 0.510  | 0.447  | 0.573  | T          | MEAN | 0.583      | 0.558  | 0.600  | 0.541  |
|                                                               | SD   | 0.152      | 0.119  | 0.103  | 0.117  |            | SD   | 0.155      | 0.155  | 0.136  | 0.211  |
| ORGAN WEIGHT TO BRAIN RATIO DATA SUMMARY OF OFFSPRING F1 MICE |      |            |        |        |        |            |      |            |        |        |        |
| PARAMETERS                                                    |      | PARAMETERS |        |        |        | PARAMETERS |      | PARAMETERS |        |        |        |
|                                                               |      | 0          | 14     | 28     | 55     |            |      | 0          | 14     | 28     | 55     |
|                                                               |      | N=22       | N=20   | N=22   | N=22   |            |      | N=22       | N=21   | N=21   | N=22   |
| S                                                             | MEAN | 27.129     | 26.671 | 27.293 | 29.048 | S          | MEAN | 23.364     | 25.187 | 24.694 | 24.746 |
|                                                               | SD   | 9.611      | 6.364  | 6.441  | 6.500  |            | SD   | 8.154      | 7.014  | 6.349  | 7.031  |
| T                                                             | MEAN | 26.371     | 21.387 | 19.860 | 20.577 | T          | MEAN | 21.432     | 21.386 | 21.191 | 18.790 |
|                                                               | SD   | 7.029      | 5.673  | 5.319  | 6.526  |            | SD   | 5.964      | 6.432  | 4.332  | 6.476  |
| ORGAN WEIGHT TO B.W. RATIO DATA SUMMARY OF OFFSPRING F2 MICE  |      |            |        |        |        |            |      |            |        |        |        |
| PARAMETERS                                                    |      | MALE       |        |        |        | PARAMETERS |      | FEMALE     |        |        |        |
|                                                               |      | 0          | 14     | 28     | 55     |            |      | 0          | 14     | 28     | 55     |
|                                                               |      | N=20       | N=20   | N=22   | N=21   |            |      | N=21       | N=20   | N=22   | N=21   |
| B                                                             | MEAN | 1.442      | 1.430  | 1.617  | 1.570# | B          | MEAN | 1.647      | 1.600  | 1.766# | 1.733# |
|                                                               | SD   | 0.098      | 0.091  | 0.364  | 0.077  |            | SD   | 0.136      | 0.134  | 0.116  | 0.116  |
| S                                                             | MEAN | 0.359      | 0.373  | 0.419  | 0.432  | S          | MEAN | 0.562      | 0.541  | 0.562  | 0.497  |
|                                                               | SD   | 0.055      | 0.071  | 0.074  | 0.017  |            | SD   | 0.111      | 0.137  | 0.118  | 0.100  |
| T                                                             | MEAN | 0.227      | 0.227  | 0.297  | 0.274  | T          | MEAN | 0.344      | 0.312  | 0.405  | 0.354  |
|                                                               | SD   | 0.248      | 0.053  | 0.084  | 0.029  |            | SD   | 0.054      | 0.090  | 0.116  | 0.103  |
| ORGAN WEIGHT TO BRAIN RATIO DATA SUMMARY OF OFFSPRING F2 MICE |      |            |        |        |        |            |      |            |        |        |        |
| PARAMETERS                                                    |      | MALE       |        |        |        | PARAMETERS |      | FEMALE     |        |        |        |
|                                                               |      | 0          | 14     | 28     | 55     |            |      | 0          | 14     | 28     | 55     |
|                                                               |      | N=20       | N=20   | N=22   | N=21   |            |      | N=21       | N=20   | N=22   | N=21   |
| S                                                             | MEAN | 25.508     | 25.386 | 25.931 | 27.139 | S          | MEAN | 32.745     | 34.402 | 31.585 | 28.611 |
|                                                               | SD   | 8.949      | 5.168  | 2.387  | 2.572  |            | SD   | 6.252      | 10.456 | 7.210  | 4.725  |
| T                                                             | MEAN | 19.051     | 15.119 | 21.301 | 16.278 | T          | MEAN | 20.928     | 19.896 | 22.329 | 20.304 |
|                                                               | SD   | 16.441     | 2.796  | 5.961  | 4.359  |            | SD   | 2.710      | 6.399  | 7.159  | 5.093  |

Brain: B; Spleen: S; Thymus: T.
